# Supplementary material for: Precipitation synthesis and characterization of SnO 2 @g-C 3 N 4 heterojunctions for enhanced photocatalytic H 2 production
Source: Royal Society of Chemistry journal article supplement (doi:10.1039/d5ra03721b), 2025-01-01
Supplement: d5ra03721b1.pdf [file d5ra03721b1.pdf]

## SUPPLEMENTARY INFORMATION

### **Co-precipitation Synthesis and Characterization of SnO<sub>2</sub>@g-C<sub>3</sub>N<sub>4</sub> Heterojunctions for Enhanced Photocatalytic H<sub>2</sub> Production**

Rizwan Khan<sup>1,2</sup>, Shah Sawar Ahmad<sup>2</sup>, Hasnain Ihsan<sup>2</sup>, Syeda Sheeza Nadeem<sup>3</sup>, Syed Zulfiqar<sup>2</sup>,  
Ferry Anggoro Ardy Nugroho<sup>1\*</sup>

1) Department of Physics, Faculty of Mathematics and Natural Sciences, Universitas Indonesia,  
Depok 16424, Indonesia

2) Department of Physics, Abdul Wali Khan University Mardan, Pakistan

3) Department of Chemistry, Faculty of Mathematics and Natural Sciences, Universitas Indonesia,  
Depok 16424, Indonesia

\*Corresponding Author. Email: [f.a.a.nugroho@sci.ui.ac.id](mailto:f.a.a.nugroho@sci.ui.ac.id) (Dr. Ferry Anggoro Ardy Nugroho)

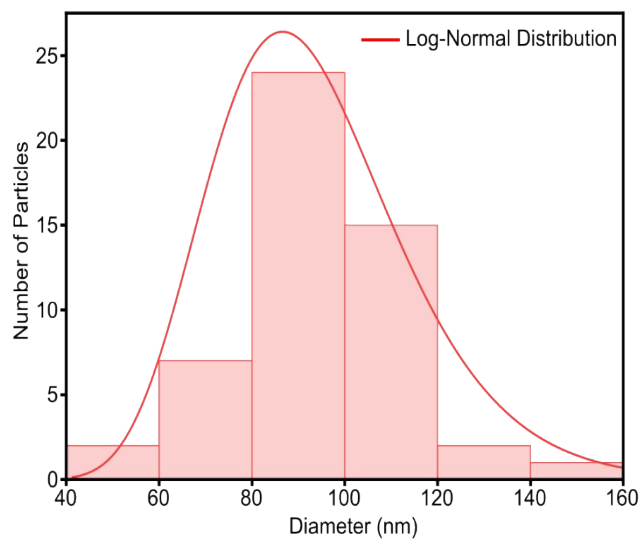

**Fig. S1** Particle diameter distribution histogram of SnO<sub>2</sub> with corresponding log-normal distribution fit, determine from SEM using ImageJ.

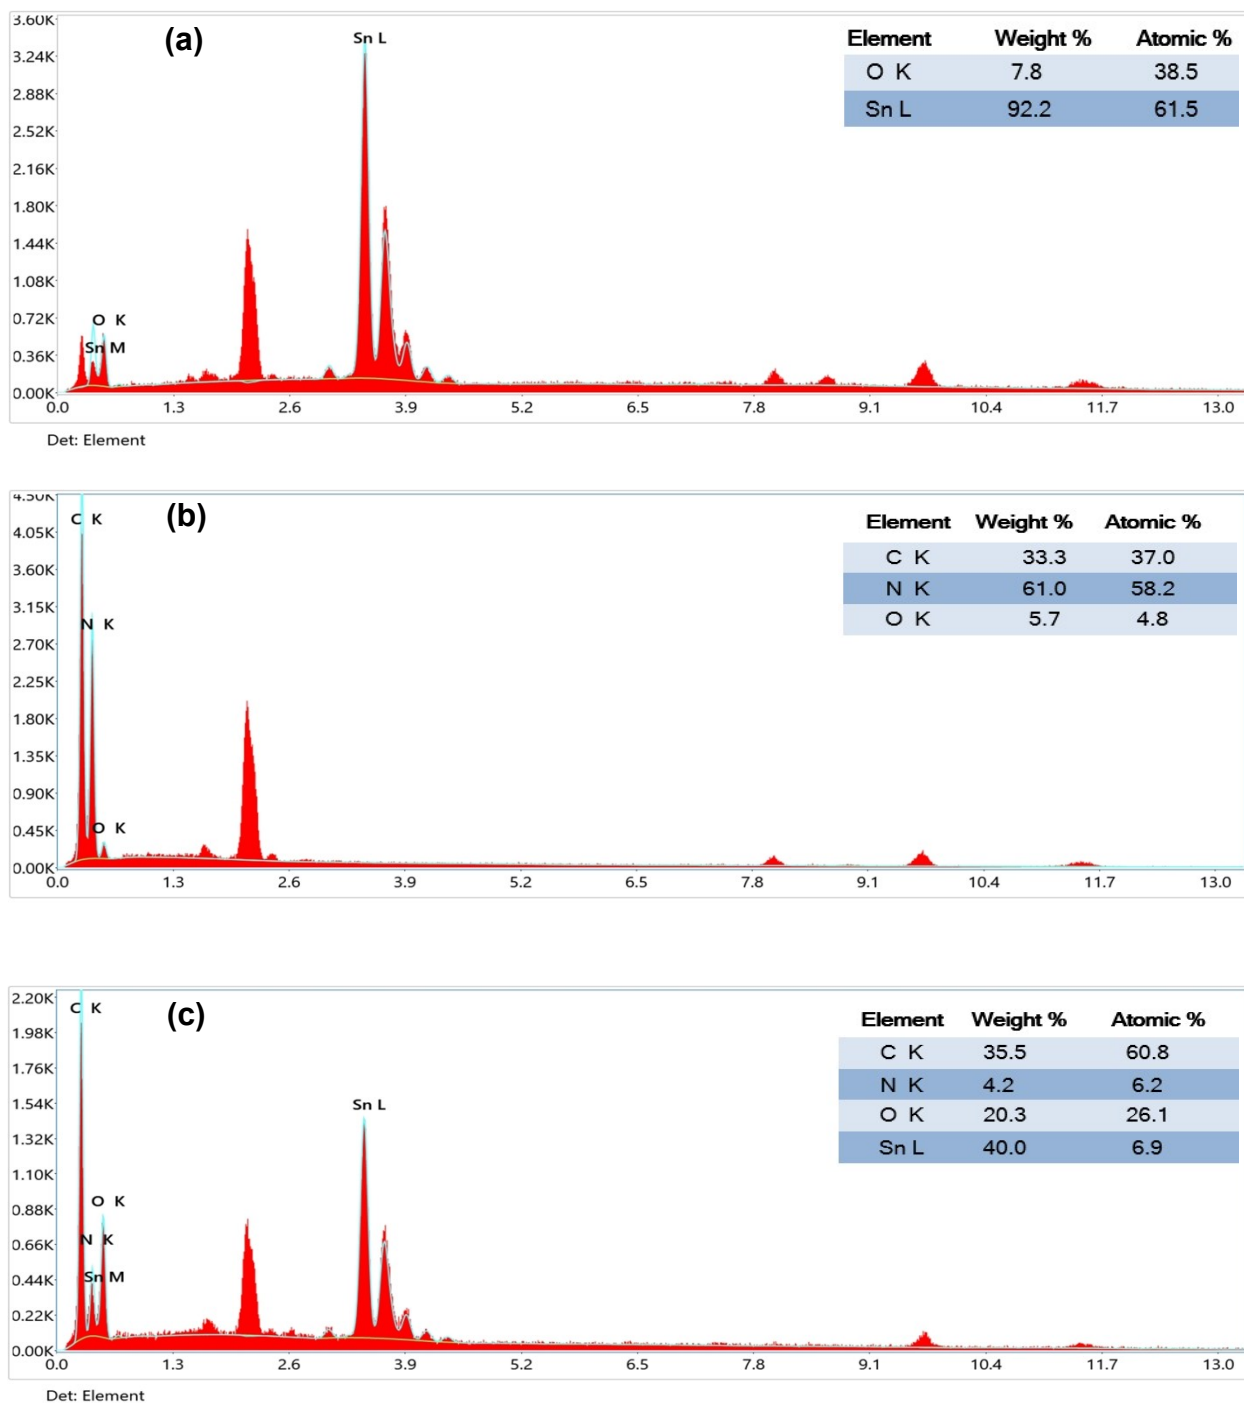

**Fig. S2** EDX analysis of (a)  $\text{SnO}_2$ , (b)  $\text{g-C}_3\text{N}_4$ , and (c)  $\text{SnO}_2@\text{g-C}_3\text{N}_4$
